# Supplementary material
Source: PubMed Central journal article supplement (PMC8020642)
Supplement: NIHMS1669956-supplement-Supplemental_material.pdf [file NIHMS1669956-supplement-Supplemental_material.pdf]

Supplemental material

<https://www.cdc.gov/asthma/nhis/2016/table2-1.htm>.

(Pearce, Ait-Khaled et al. 2007), (Hanifin, Reed et al. 2007, Akinbami, Moorman et al. 2012, Silverberg and Simpson 2014, Silverberg 2017, Samady, Warren et al. 2019)

Akinbami, L. J., J. E. Moorman, C. Bailey, H. S. Zahran, M. King, C. A. Johnson and X. Liu (2012). "Trends in asthma prevalence, health care use, and mortality in the United States, 2001-2010." NCHS Data Brief(94): 1-8.

Hanifin, J. M., M. L. Reed, P. Eczema and G. Impact Working (2007). "A population-based survey of eczema prevalence in the United States." Dermatitis **18**(2): 82-91.

Pearce, N., N. Ait-Khaled, R. Beasley, J. Mallol, U. Keil, E. Mitchell, C. Robertson and I. P. T. S. Group (2007). "Worldwide trends in the prevalence of asthma symptoms: phase III of the International Study of Asthma and Allergies in Childhood (ISAAC)." Thorax **62**(9): 758-766.

Samady, W., C. Warren, S. Kohli, R. Jain, L. Bilaver, A. J. Mancini and R. Gupta (2019). "The prevalence of atopic dermatitis in children with food allergy." Ann Allergy Asthma Immunol **122**(6): 656-657 e651.

Silverberg, J. I. (2017). "Public Health Burden and Epidemiology of Atopic Dermatitis." Dermatol Clin **35**(3): 283-289.

Silverberg, J. I. and E. L. Simpson (2014). "Associations of childhood eczema severity: a US population-based study." Dermatitis **25**(3): 107-114.
